# Supplementary material for: Assessing patient experience of the tenets of osteopathic medicine
Source: publisher site journal article supplement (doi:10.1515/jom-2023-0038), 2023-05-16
Supplement: Supplementary file 1 [file j_jom-2023-0038_suppl_001.docx]

**Survey Items**

| **English** | **References** |
| --- | --- |
| **Informed Consent** |  |
| I understand taking this survey is voluntary and confidential, my responses will not affect my medical care, and if I take the survey I can still decide not to answer any question.  I understand my responses will be used for research and I can contact Walter Hartwig at Touro University - CA with questions PHONE NUMBER REDACTED. |  |
| **Demographics** |  |
| Name of Doctor I saw todaya |  |
| My Age isb |  |
| My Gender isc |  |
| This is the [BLANK] time I have seen this doctord |  |
| I came in today fore |  |
| **Philosophy – T1f** |  |
| My doctor asked about other parts of my life at work or home. | Cf. 2, 5 |
| My doctor talked about my total health. | Cf. 2 |
| My doctor asked about my feelings and mood. | Cf. 2 |
| My doctor asked about why I was here. |  |
| **Philosophy – T2g** |  |
| My doctor said my body can get better on its own. | Cf. 2, 5 |
| My doctor said I could try natural things besides medicine to help my problem. | Cf. 2 |
| My doctor suggested ways that I can stay healthy. | Cf. 2, 5 |
| **Philosophy – T3h** |  |
| My doctor examined more parts of my body than just the problem part. | Cf. 2, 5 |
| My doctor examined my muscles and bones. | Cf. 2 |
| **Philosophy – T4i** |  |
| My doctor treated my body with their hands to help me feel better. |  |
| My doctor told me how the hands on treatment they used could make me feel better. |  |
| My doctor asked what I think would help my problem. | Cf. 2, 5 |
| My doctor explained how their suggestions would help me. | Cf. 2, 5 |
| **Empathyj** |  |
| My doctor is a good listener | Cf. 14 |
| My doctor understood my concerns | Cf. 16, |
| I understand what my doctor wants me to do next | Cf. 16, 14 |
| I trust what my doctor said | Cf. 16 |
| I will do what my doctor has asked me to do |  |
| My doctor helped me see my problems differently |  |
| **Satisfaction with Visitj** |  |
| I am satisfied with my doctor today | Cf. 5 |
| I would recommend this doctor to friends and family | Cf. 5, 16 |
| I feel better about my problem |  |
| aThis was a free text entry and only used to determine whether the provider was a physician, versus midlevel or other.  bAnswer choices: < 18; 18 – 30; 31 – 40; 41 – 50; 51 – 60; 61 – 70; 71 – 80; > 80  cAnswer choices: Male, Female, Other  dAnswer choices: First time, Second time, Third time (or more)  eOptions included regular checkup; follow up from another visit; a new specific problem; other  Tenets of Osteopathic Medicine answer choices: Yes; No  fT1 (Tenet1) The body is a unit; the person is a unity of body, mind and spirit  gT2 (Tenet2) The body is capable of self-regulation, self-healing, and health maintenance  hT3 (Tenet3) Structure and function are reciprocally interrelated  iT4 (Tenet4) Rational treatment is based upon an understanding of the basic principles of body unity, regulation, and the interrelationship of structure and function  jAnswer choices: Strongly disagree, disagree, agree, strongly agree, no opinion | |
